# Supplementary material for: Microbiome manipulation and enhanced weathering stimulate CO2 removal in reforestation
Source: Research Square preprint supplement (doi:10.21203/rs.3.rs-5982308/v1), 2025-02-27
Supplement: Supplementary file 1 [file 0ccf639b97200bfe684ca8e6.docx]

**Supplementary Information: *Microbiome manipulation and enhanced weathering stimulate CO2 removal in reforestation***

**Mineralogical Analysis of Basalt Rock Dust**

***X-Ray Diffraction***

XRD analyses were undertaken at Imperial College London’s Civil and Environmental Engineering Material Laboratory. XRD analyses were conducted on top-loaded, randomly oriented samples with a Rigaku miniflex diffractometer using CuKα radiation, run at 40 kV and 15 mA. These are continuous scans 2θ = 2.00-80.00°, with a step size of 0.01, and a scan speed of 0.0833°/second, performed with a 1° divergence slit. Semi-quantitative results are calculated by HighScore Panalytical software, using referenced scale factor and Reference Intensity Ratio (RIR) values from the International Centre of Diffraction Data (ICDD) mineral database. This normalized RIR method (Chung 1974a, b; 1975) produces semi-quantitative results as estimated mass fractions using peak intensity values.

Semi-quantitative data from 5 replicates of feedstock basalt ground to <90 microns are presented in **Table 1**.  Sodium-rich plagioclase felspar represents the most abundant mineral constituent (61-83%), followed by moderate amounts of chlorite (12-18%) and trace vermiculite (0-2%), with variable amounts of quartz (0-5%), and calcite (1-14%). We note that the plagioclase is compositionally intermediate, with peaks matched to end-member albite and calcium-rich labradorite.

**Table 1.** Mineral composition of five basalt samples determined via XRD. As the analysis is semi-quantitative, percentages may not sum to 100**.**

|  | Chlorite | Vermiculite | Total Clay | Quartz | Plagioclase | Calcite | Total |  |  |
| --- | --- | --- | --- | --- | --- | --- | --- | --- | --- |
| Sample 1 | 18 | 2 | 18 | 5 | 61 | 14 | 100 |  |  |
| Sample 2 | 12 | 2 | 12 |  | 83 | 4 | 101 |  |  |
| Sample 3 | 16 | 0 | 16 |  | 82 | 1 | 99 |  |  |
| Sample 4 | 15 | 1 | 15 |  | 77 | 7 | 100 |  |  |
| Sample 5 | 14 | 1 | 14 | 1 | 80 | 5 | 101 |  |  |
|  |  |  |  |  |  |  |  |  |  |
|  |  |  |  |  |  |  |  |  |  |

**X-Ray Fluorescence.**

Elemental composition of the basalt feedstock (n=4) is presented in **Table 2.** These measurements were performed with a Malvern Panalytical Zetium XRF spectrometer; Loss-on-ignition (LOI) was calculated gravimetrically with a blast furnace at 1050 °C for 1 Hour (Lechler & Desilets, 1987), oxide composition values account for LOI = 11.15%. Based on the elemental composition, the feedstock is classified as a basaltic andesite (**Fig 1).**

**Table 2.** Elemental composition of crushed basalt applied to selected plots, determined via XRF analysis. Trace amounts (<0.01%) of Ni, Cu, Zn, Br, Sr, Y, and Zr were detected.

| **Element** | **Weight Percentage** |
| --- | --- |
| Si | 55.32 |
| Al | 18.22 |
| Fe | 9.81 |
| Mg | 6.43 |
| Ca | 4.55 |
| Na | 3.19 |
| Ti | 1.55 |
| P | 0.39 |
| K | 0.24 |
| S | 0.17 |
| Mn | 0.12 |
| Cr | 0.02 |

**Fig 1.** Total alkali silica diagram for rock dust feedstock applied at the Glandwr Forest experiment.This figure was created using the TAS Diagram Plotter V 3.0 (<https://zenodo.org/records/5907859>)

**References cited**

Chung, F. H. (1974a). Quantitative interpretation of X-ray diffraction patterns of mixtures. I. Matrix-flushing method for quantitative multicomponent analysis. Journal of Applied Crystallography, 7(6), 519-525.

Chung, F. H. (1974b). Quantitative interpretation of X-ray diffraction patterns of mixtures. II. Adiabatic principle of X-ray diffraction analysis of mixtures. Journal of Applied Crystallography, 7(6), 526-531.

Chung, F. H. (1975). Quantitative interpretation of X-ray diffraction patterns of mixtures. III. Simultaneous determination of a set of reference intensities. Journal of Applied Crystallography, 8(1), 17-19.
